# Supplementary material
Source: bioRxiv or medRxiv preprint supplement (https://medrxiv.org/highwire/filestream/82458/field_highwire_adjunct_files/0/2020.05.22.20110502-1.pdf)
Supplement: Supplementary file [file 2020.05.22.20110502-1.pdf]

Supplementary Information Appendix:  
Conditions for a second wave of COVID-19 due  
to interactions between disease dynamics and  
social processes

Sansao A. Pedro<sup>1</sup>, Frank T. Ndjomatchoua<sup>2</sup>,  
Peter Jentsch<sup>3,4</sup>, Jean M. Tchuente<sup>5</sup>, Madhur Anand<sup>3</sup>, Chris T. Bauch<sup>4,\*</sup>

22 May 2020

1: Universidade Eduardo Mondlane, Departamento de Matemática e Informática,  
Maputo, Mozambique

2: International Rice Research Institute, Sustainable Impact Platform, Geospa-  
tial Science and Modelling cluster, DAPO Box 7777-1301, Metro Manila, Philip-  
pines

3: University of Guelph, School of Environmental Sciences, Guelph, N1G 2W1,  
Canada

4: University of Waterloo, Department of Applied Mathematics, Waterloo, N2L  
3G1, Canada

5: Avenir Health, Glastonbury, CT, USA

\*: Correspondence to: cbauch@uwaterloo.ca

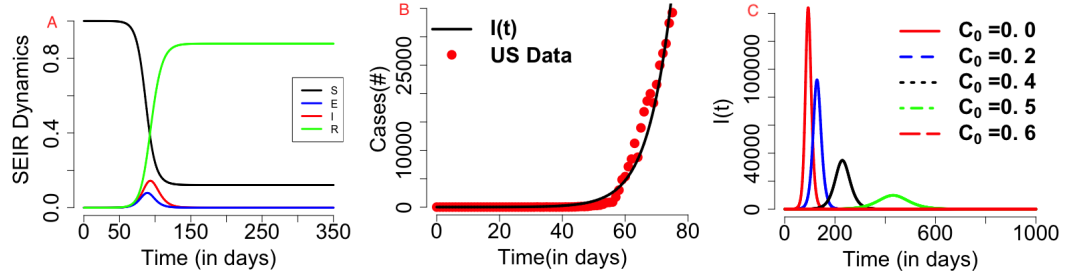

Figure 1: Epidemiological dynamics in the absence of control measures (a), fit of the model to United States data (b), and effects of social distancing measures in flattening the epidemic curve (c). Time series for susceptible (S), latent (E), infected (I) and recovered (R) individuals from the model is shown on the left. Time window on the right runs from 21-01-2020 to 05-04-2020 and compares case prevalence in model to corresponding US data. All parameters are at baseline parameter values (Table 1) and initial conditions  $S(0) = 1000000$  and  $I(0) = 1$ , except for control parameters in (a) that are set to zero in the absence of control.

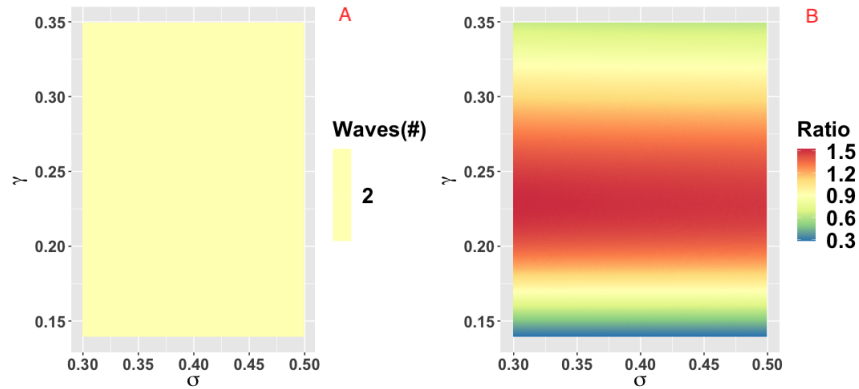

Figure 2: Parameter plane showing model dynamics as they vary with changes in the rate  $\gamma$  at which the infectious period ends and the rate  $\sigma$  at which the latent period ends, for the number of COVID-19 waves (a) and the ratio of peak height of the second wave to the first wave peak (b). Other parameters are at baseline values (Table 1).

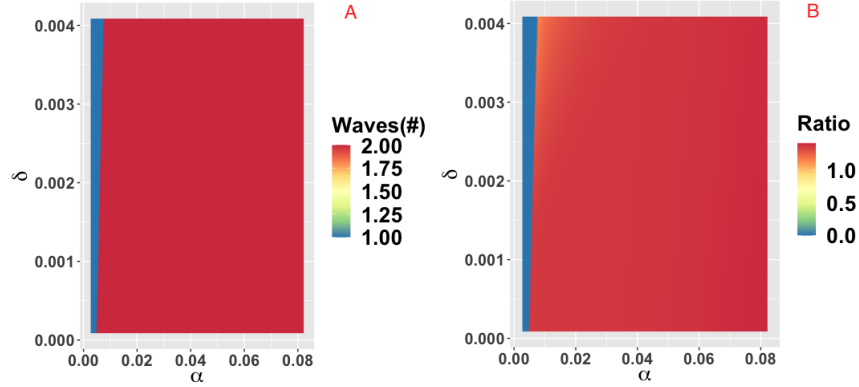

Figure 3: Parameter plane showing model dynamics as they vary with changes in the rate  $\alpha$  at which socio-economic losses accrue and the rate  $\delta$  at which socio-economic losses are discounted, for the number of COVID-19 waves (a) and the ratio of peak height of the second wave to the first wave peak. Other parameters are at baseline values (Table 1).

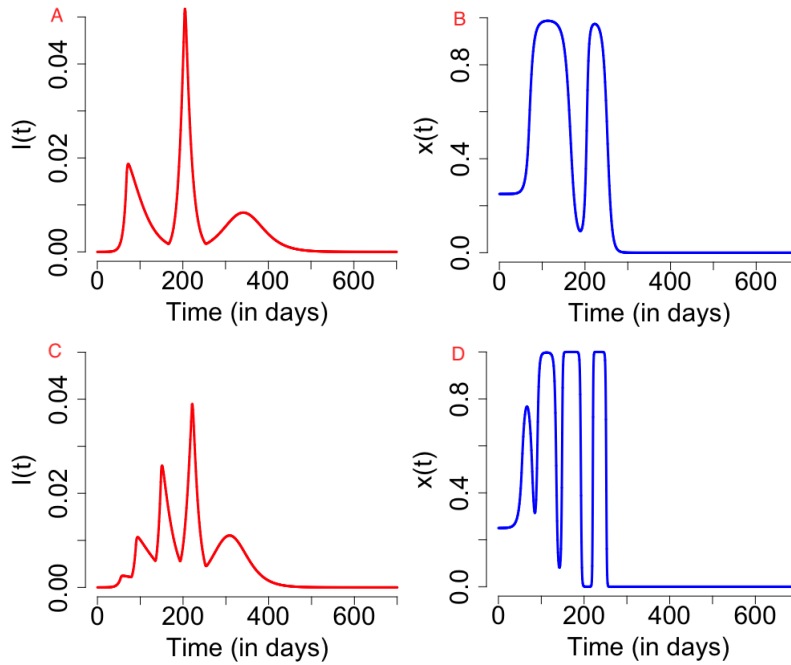

Figure 4: Time series plot of infection,  $I(t)$  and social,  $x(t)$  dynamics, (upper) for  $\kappa = 10$  and (bottom) for  $\kappa = 80$ .
